# Supplementary material for: Sugar types, genetic predictors of the gut microbiome, and the risk of chronic kidney disease: a prospective cohort study
Source: Royal Society of Chemistry journal article supplement (doi:10.1039/d4fo00724g), 2024-01-01
Supplement: d4fo00724g1.pdf [file d4fo00724g1.pdf]

## **Sugar types, genetic predictors of gut microbe, and the risk of chronic kidney disease: a prospective cohort study**

Gang Zheng <sup>1, 2#</sup>, Yixiao Zhang <sup>1, 2, 3#</sup>, Fengrong Ou<sup>4</sup>, Qing Chang <sup>1, 2</sup>, Chao Ji <sup>1, 2</sup>,  
Honghao Yang <sup>1, 2</sup>, Liangkai Chen<sup>5</sup>, Yang Xia <sup>1, 2\*</sup>, Yuhong Zhao <sup>1, 2\*</sup>

**Supplementary Figure S1.** Directed acyclic graph for the associations of free and non-free sugar intakes with the risk of CKD.

**Supplementary Figure S2.** Associations (HRs and 95% CIs) between free sugar intake, non-free sugar intake, and incident CKD by genetically predicted eGFR.

**Supplementary Figure S3.** Subgroup analyses for the associations (HRs and 95% CIs) of free and non-free sugar intake with incident CKD in 138,064 participants.

**Supplementary Table S1.** Characteristics of the 19 SNPs associated with gut microbiome abundance.

**Supplementary Table S2.** SNPs used for creating the eGFR-PGS in the UK Biobank Study.

**Supplementary Table S3.** Associations (HRs and 95% CIs) between genetic risk of gut microbial abundance and incident CKD in 138,064 participants.

**Supplementary Table S4.** Associations (HRs and 95% CIs) between genetic risk of eGFR and incident CKD in 138,064 participants.

**Supplementary Table S5.** The associations (HRs and 95% CIs) between free sugar intake, non-free sugar intake, and incident CKD in sensitivity analyses restricting to participants who conducted two or more dietary assessments (n = 85,410).

**Supplementary Table S6.** The associations (HRs and 95% CIs) between free sugar intake, non-free sugar intake, and incident CKD in sensitivity analyses restricting to participants with  $\geq$  two years of follow-up (n = 137,342).

**Supplementary Table S7.** The associations (HRs and 95% CIs) between free sugar intake and non-free sugar intake in grams and incident CKD in 138,064 participants.

**Supplementary Table S8.** Associations (HRs and 95% CIs) between free and non-free sugar intakes to carbohydrates intakes ratio, and incident CKD in 138,064 participants.

**Supplementary Table S9.** Associations (HRs and 95% CIs) between free sugar intake, non-free sugar intake, and incident CKD using the sub-distribution competing risk model in 138,064 participants.

**Supplementary Table S10.** Associations (HRs and 95% CIs) between free sugar intake, non-free sugar intake, and incident CKD with further adjustments of cardiometabolic biomarkers or eGFR.

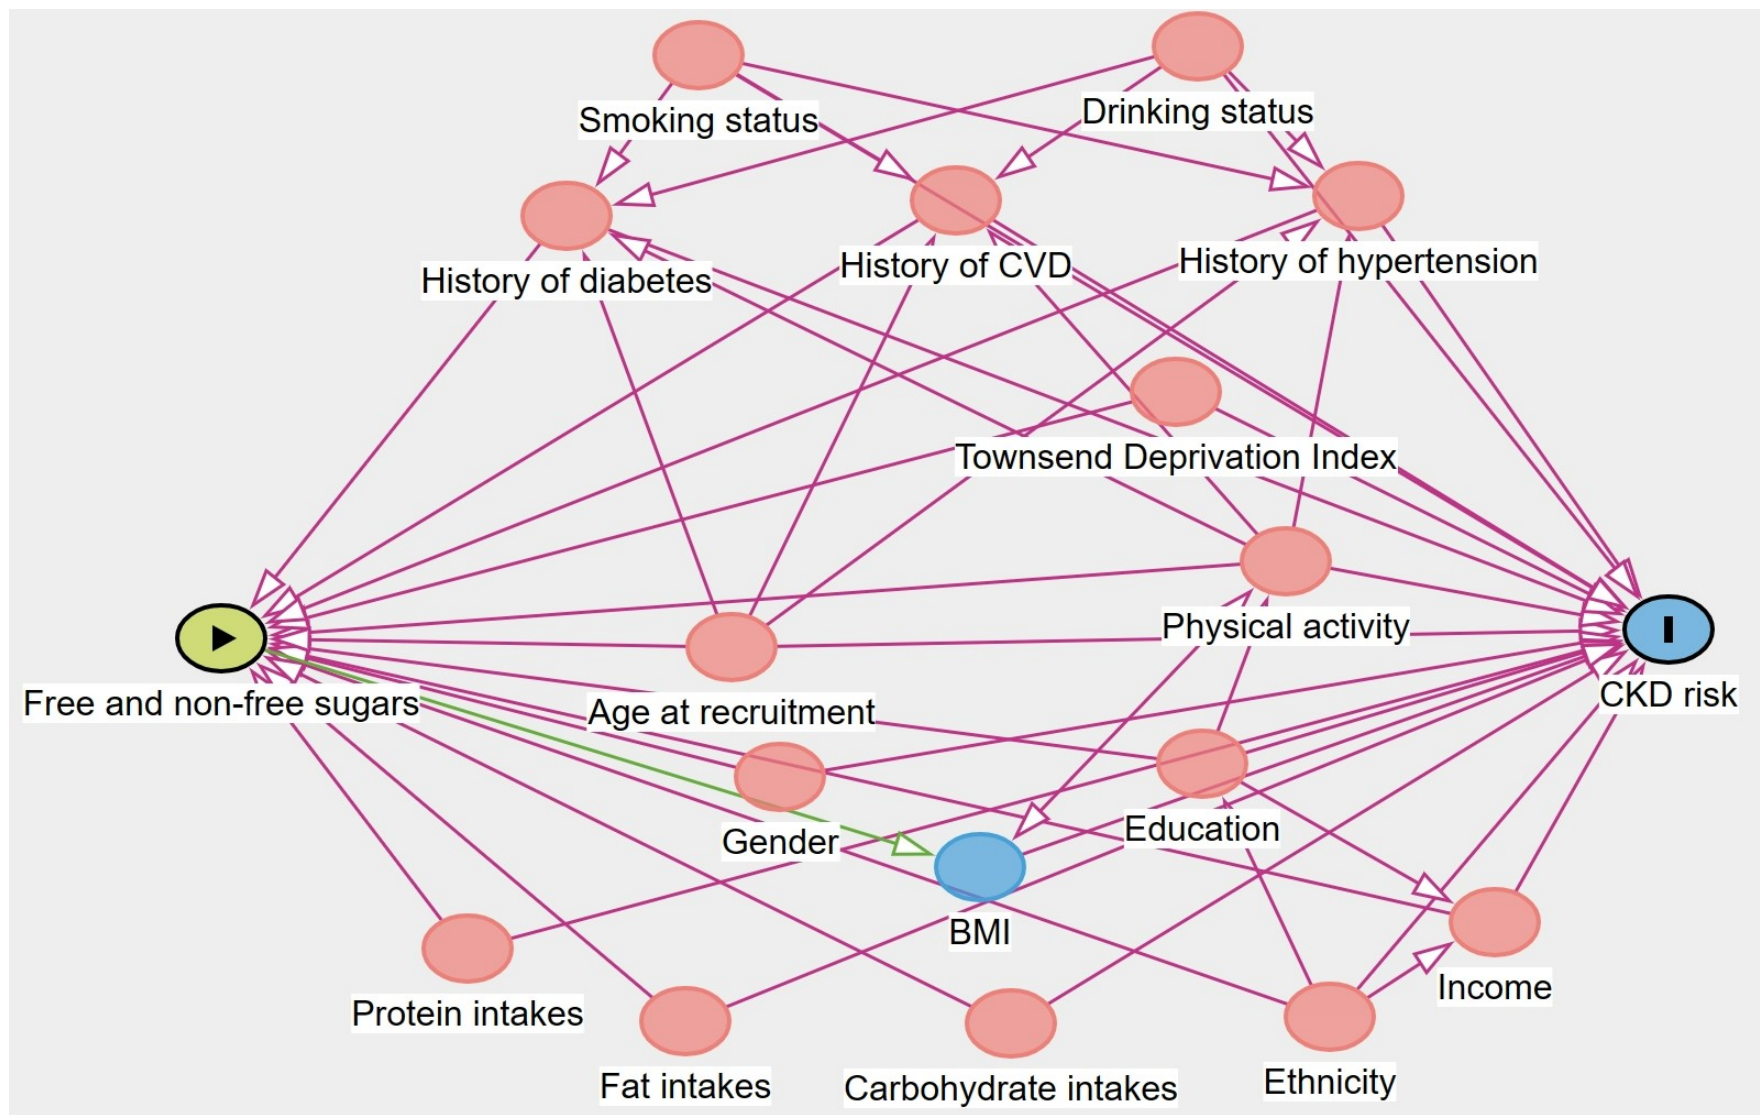

**Supplementary Figure S1. Directed acyclic graph for the associations of free and non-free sugar intakes with the risk of CKD.** BMI, body mass index; CKD, chronic kidney disease; CVD, cardiovascular diseases. Red circles represent ancestors of the exposure and outcome, blue circles represent ancestors of the outcome, and green circles represent ancestors of exposure.

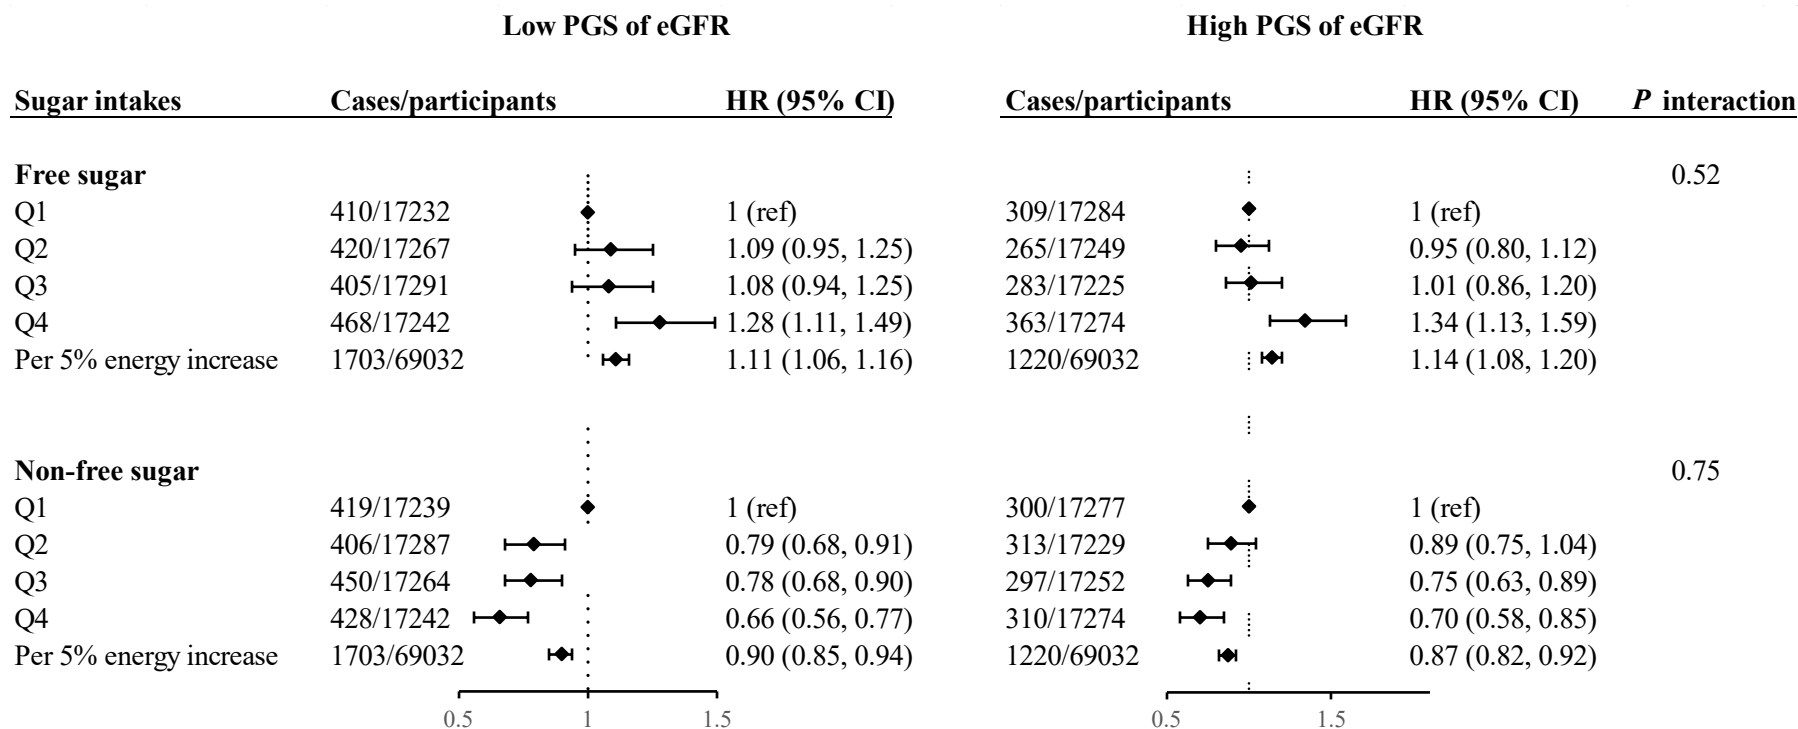

**Supplementary Figure S2. Associations (HRs and 95% CIs) between free sugar intake, non-free sugar intake, and incident CKD by genetically predicted eGFR.** CIs, confidence intervals; CKD, chronic kidney disease; eGFR, estimated glomerular filtration rate; HRs, hazard ratios; PGS, polygenic score; Q, quintile; ref, reference group. The model was adjusted for age at recruitment (years), sex (men, women), ethnicity (White, Asian, Black, Mixed), education (college or university degree, high school, below), average total household income before tax (<£18,000, £18,000–£51,999, >£52,000), Townsend Deprivation Index (continuous), physical activity (MET-min/week), intakes of carbohydrate, protein, and fat (percentage of energy intake), history of hypertension, cardiovascular disease, diabetes (yes, no), the first 10 genetic principal components, and genotyping batch. A high polygenic score for eGFR indicates a higher genetic predisposition to elevated eGFR levels, with a low polygenic score

indicating a lower genetic predisposition.

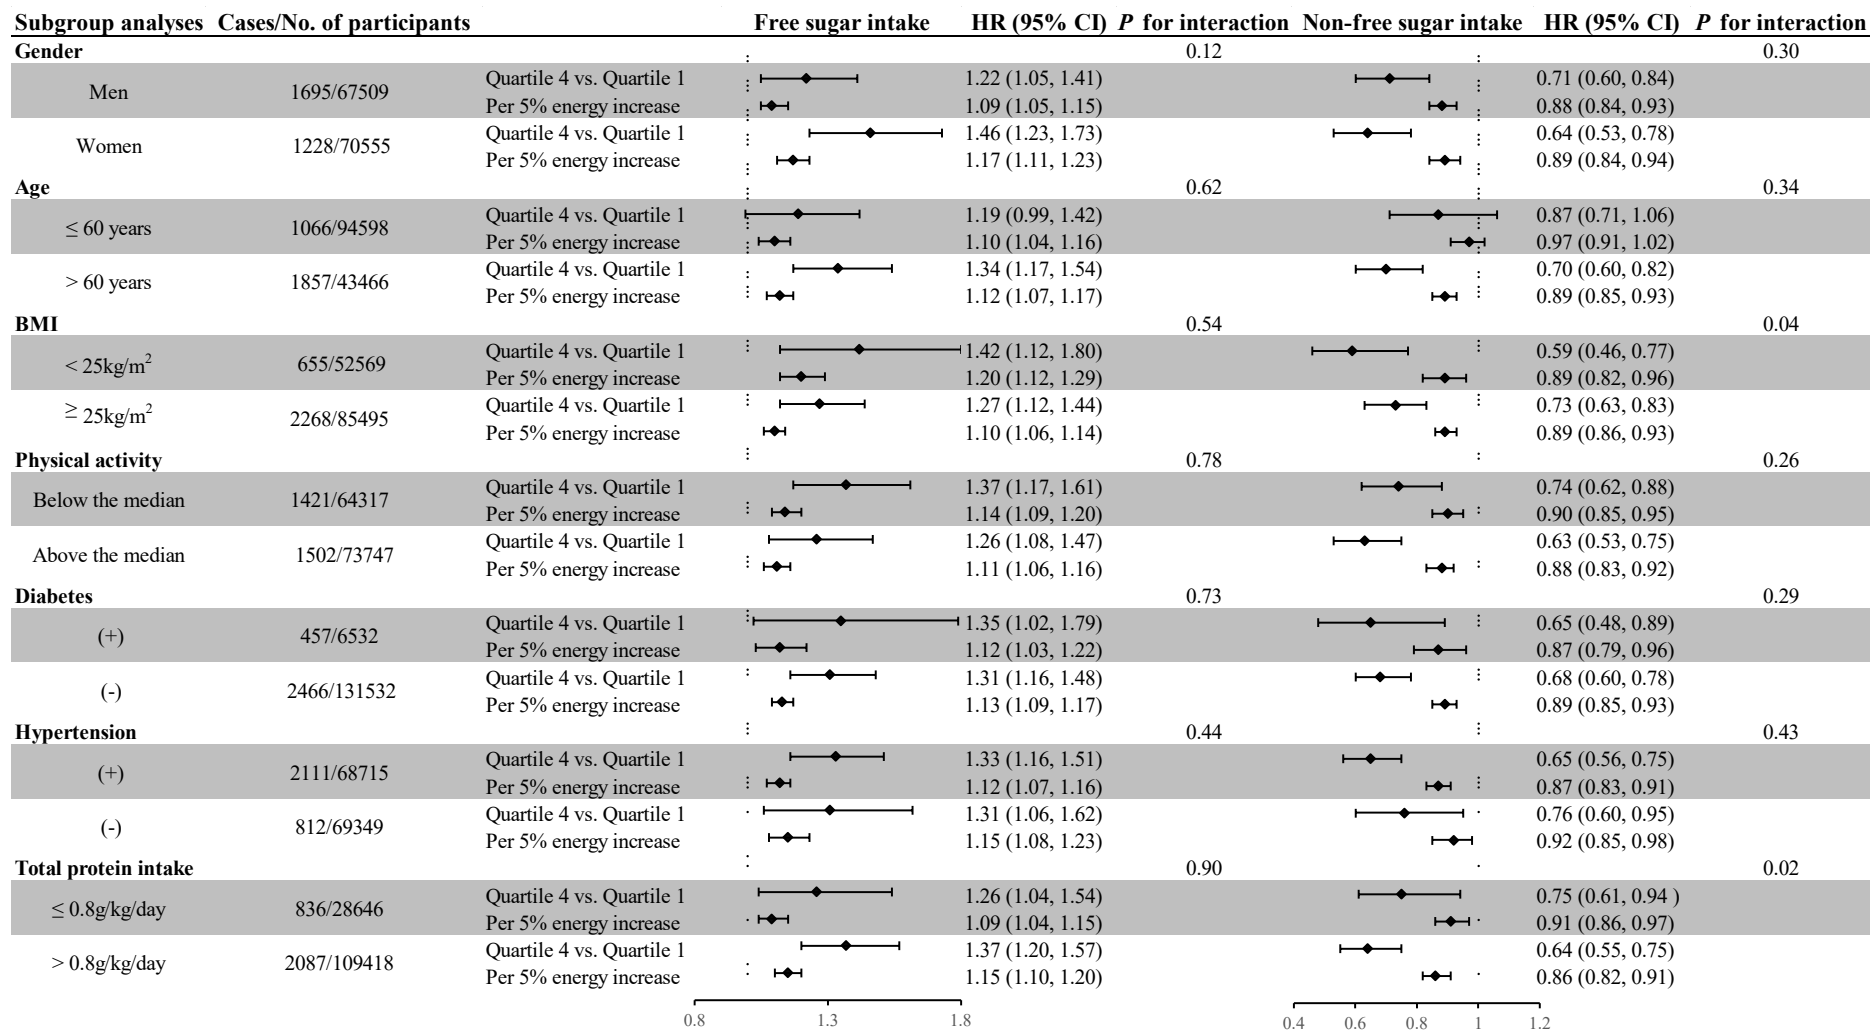

Supplementary Figure S3. Subgroup analyses for the associations (HRs and 95% CIs) of free and non-free sugar intake with incident

**CKD in 138,064 participants.** BMI, body mass index; CIs, confidence intervals; HRs, hazard ratios. HRs were calculated from cause-specific competing risk models adjusted for age at recruitment (years), sex (men, women), ethnicity (White, Asian, Black, Mixed), education (college or university degree, high school, below), average total household income before tax (<£18,000, £18,000–£51,999, >£52,000), Townsend Deprivation Index (continuous), physical activity (MET-min/week), intakes of carbohydrate, protein, and fat (percentage of energy intake), history of hypertension, and cardiovascular disease, diabetes (yes, no).

**Supplementary Table S1. Characteristics of the 19 SNPs associated with gut microbiome abundance.**



| SNP ID     | Chr | EA | OA | Beta     | EAF  | Phylum         |
|------------|-----|----|----|----------|------|----------------|
| rs10769159 | 11  | G  | C  | -0.06403 | 0.56 | Firmicutes     |
| rs10805326 | 4   | G  | A  | 0.077515 | 0.34 | Firmicutes     |
| rs11098863 | 4   | T  | A  | -0.0966  | 0.53 | Actinobacteria |
| rs11110281 | 12  | T  | C  | -0.13404 | 0.06 | Firmicutes     |
| rs12320842 | 12  | C  | G  | 0.094833 | 0.15 | Firmicutes     |
| rs12781711 | 10  | C  | T  | -0.06561 | 0.30 | Firmicutes     |
| rs17159861 | 7   | C  | T  | 0.096223 | 0.11 | Firmicutes     |
| rs182549   | 2   | C  | T  | 0.116333 | 0.49 | Actinobacteria |
| rs4428215  | 3   | G  | A  | 0.12561  | 0.25 | Proteobacteria |
| rs602075   | 9   | A  | G  | 0.168974 | 0.23 | Firmicutes     |
| rs61841503 | 10  | G  | A  | 0.092427 | 0.13 | Firmicutes     |
| rs67476743 | 19  | T  | G  | 0.132164 | 0.26 | Firmicutes     |
| rs7221249  | 17  | A  | G  | 0.083986 | 0.51 | Firmicutes     |
| rs7322849  | 13  | T  | C  | 0.11126  | 0.13 | Actinobacteria |
| rs736744   | 9   | C  | T  | 0.117882 | 0.49 | Proteobacteria |
| rs75754569 | 3   | C  | G  | 0.181434 | 0.10 | Firmicutes     |
| rs8009993  | 14  | G  | C  | -0.13594 | 0.11 | Firmicutes     |
| rs830151   | 19  | G  | A  | 0.194561 | 0.11 | Firmicutes     |
| rs9864379  | 3   | T  | C  | -0.16052 | 0.11 | Cyanobacteria  |

SNP: single nucleotide polymorphism. Chr: chromosome. EA: effective allele, OA: other allele, EAF: effective allele frequency.

**Supplementary Table S2. SNPs used for creating the eGFR-PGS in the UK Biobank Study.**

| SNP        | Effect Allele | Chr | Effect  | Locus        |
|------------|---------------|-----|---------|--------------|
| rs61830291 | a             | 1   | -0.0036 | LINC01352    |
| rs2490391  | a             | 1   | -0.0024 | SDCCAG8      |
| rs12061708 | a             | 1   | -0.0026 | KLHDC7A      |
| rs2749153  | a             | 1   | -0.0033 | ZNF436-AS1   |
| rs688540   | a             | 1   | -0.0030 | FOXD2        |
| rs3845534  | a             | 1   | -0.0019 | LOC100422212 |
| rs1011731  | a             | 1   | -0.0019 | DNM3         |
| rs78444298 | a             | 1   | -0.0105 | EDEM3        |
| rs78329830 | a             | 1   | -0.0054 | PLA2G4A      |
| rs1887252  | c             | 1   | -0.0019 | LINC01362    |
| rs7543734  | c             | 1   | 0.0031  | BCAR3        |
| rs74748843 | t             | 1   | -0.0048 | CASZ1        |
| rs659437   | t             | 1   | -0.0027 | AKR1A1       |
| rs10159261 | t             | 1   | -0.0034 | AGMAT        |
| rs267738   | t             | 1   | -0.0048 | CERS2        |
| rs17413465 | a             | 1   | 0.0025  | MIR4422HG    |
| rs11211257 | a             | 1   | 0.0027  | PIK3R3       |
| rs1757915  | a             | 1   | 0.0021  | LINC01755    |
| rs11166440 | a             | 1   | 0.0020  | CDC14A       |
| rs10857788 | a             | 1   | 0.0030  | SYPL2        |
| rs4971100  | a             | 1   | 0.0020  | TRIM46       |
| rs3850625  | a             | 1   | 0.0046  | CACNA1S      |
| rs2808454  | a             | 1   | 0.0019  | PFKFB2       |
| rs12736457 | c             | 1   | 0.0054  | PPM1J        |
| rs75625374 | c             | 1   | 0.0045  | CD34         |
| rs7536433  | t             | 1   | 0.0021  | AK5          |
| rs679843   | t             | 1   | 0.0021  | MGC27382     |
| rs3118119  | t             | 1   | 0.0030  | LOC105371433 |

---

|             |   |   |         |           |
|-------------|---|---|---------|-----------|
| rs4656220   | t | 1 | 0.0020  | PRRX1     |
| rs3795503   | t | 1 | 0.0020  | KIAA1614  |
| rs7535253   | t | 1 | 0.0021  | PTPN14    |
| rs2577134   | t | 1 | 0.0020  | RNU5F-1   |
| rs417237    | t | 1 | 0.0018  | OBSCN     |
| rs1047891   | a | 2 | -0.0065 | CPS1      |
| rs17050272  | a | 2 | -0.0022 | LINC01101 |
| rs2971880   | a | 2 | -0.0024 | SPTBN1    |
| rs60980181  | a | 2 | -0.0027 | CALCRL    |
| rs4664475   | t | 2 | -0.0020 | NEB       |
| rs35472707  | t | 2 | -0.0073 | LRP2      |
| rs2301343   | t | 2 | -0.0023 | SLC8A1    |
| rs35284526  | a | 2 | 0.0029  | NFE2L2    |
| rs4491726   | a | 2 | 0.0032  | RDH14     |
| rs6546869   | a | 2 | 0.0059  | ALMS1P1   |
| rs11694902  | a | 2 | 0.0041  | TFCP2L1   |
| rs7425436   | a | 2 | 0.0024  | ORC4      |
| rs35669853  | a | 2 | 0.0024  | MIR5702   |
| rs10197255  | a | 2 | 0.0018  | LINC01812 |
| rs10865189  | c | 2 | 0.0024  | ZFP36L2   |
| rs187355703 | c | 2 | 0.0100  | HOXD8     |
| rs780093    | t | 2 | 0.0044  | GCKR      |
| rs11123169  | t | 2 | 0.0025  | PSD4      |
| rs1548945   | t | 2 | 0.0036  | TNP1      |
| rs1050816   | t | 2 | 0.0026  | SPEG      |
| rs13003198  | t | 2 | 0.0018  | SAG       |
| rs807624    | t | 2 | 0.0032  | DDX1      |
| rs4666821   | t | 2 | 0.0020  | PDE1A     |
| rs3791221   | a | 2 | 0.0022  | SH3YL1    |

---

---

|            |   |   |         |              |
|------------|---|---|---------|--------------|
| rs6779998  | a | 3 | -0.0017 | TGFBR2       |
| rs4625     | a | 3 | -0.0023 | DAG1         |
| rs9828976  | c | 3 | -0.0024 | SLC35G2      |
| rs56065557 | c | 3 | -0.0029 | SENP2        |
| rs6778731  | t | 3 | -0.0017 | WNT7A        |
| rs3774726  | t | 3 | -0.0021 | ATXN7        |
| rs2289746  | t | 3 | -0.0019 | CBLB         |
| rs35320690 | t | 3 | -0.0025 | MSL2         |
| rs11919484 | t | 3 | -0.0026 | KNG1         |
| rs2581820  | a | 3 | 0.0021  | SFMBT1       |
| rs9868185  | a | 3 | 0.0026  | SLC15A2      |
| rs1397764  | a | 3 | 0.0043  | TFDP2        |
| rs9823161  | a | 3 | 0.0022  | LINC02028    |
| rs11914389 | t | 3 | 0.0030  | ACVR2B       |
| rs7651407  | t | 3 | 0.0025  | PLXNB1       |
| rs10934754 | t | 3 | 0.0020  | ALDH1L1-AS2  |
| rs7624084  | t | 3 | 0.0017  | ZBTB38       |
| rs76272256 | t | 3 | 0.0024  | MECOM        |
| rs795009   | t | 3 | 0.0020  | SYN2         |
| rs3775932  | a | 4 | -0.0018 | WDR1         |
| rs16874073 | t | 4 | -0.0045 | PPARGC1A     |
| rs4864890  | t | 4 | -0.0023 | DCUN1D4      |
| rs12509595 | t | 4 | -0.0035 | FGF5         |
| rs75501914 | a | 4 | 0.0039  | HGFAC        |
| rs71606723 | a | 4 | 0.0025  | UGT8         |
| rs223471   | c | 4 | 0.0028  | LOC102723704 |
| rs55929207 | c | 4 | 0.0019  | ETNPPL       |
| rs28817415 | t | 4 | -0.0073 | SHROOM3      |
| rs12163971 | a | 5 | -0.0029 | AFF4         |

---

---

|            |   |   |         |           |
|------------|---|---|---------|-----------|
| rs13159523 | a | 5 | -0.0024 | TPPP      |
| rs13157326 | a | 5 | -0.0027 | RAI14     |
| rs2010352  | a | 5 | -0.0018 | AK6       |
| rs1362800  | t | 5 | -0.0049 | DAB2      |
| rs3812036  | t | 5 | -0.0065 | SLC34A1   |
| rs72759880 | t | 5 | -0.0056 | PIK3R1    |
| rs3797537  | a | 5 | 0.0019  | DMGDH     |
| rs12520984 | c | 5 | 0.0019  | FST       |
| rs12777    | c | 5 | 0.0050  | SLC22A4   |
| rs11746506 | t | 5 | 0.0017  | MRPS30    |
| rs11743174 | t | 5 | 0.0019  | ABLIM3    |
| rs495237   | t | 5 | 0.0027  | LINC00603 |
| rs79760705 | t | 5 | 0.0056  | ARL15     |
| rs881858   | a | 6 | -0.0054 | LINC01512 |
| rs72912510 | a | 6 | -0.0024 | RRAGD     |
| rs9375818  | a | 6 | -0.0031 | ARG1      |
| rs3822939  | a | 6 | -0.0025 | EYA4      |
| rs12207180 | a | 6 | -0.0085 | SLC22A2   |
| rs12212034 | t | 6 | -0.0018 | PKHD1     |
| rs6458868  | t | 6 | -0.0020 | GSTA2     |
| rs3925003  | t | 6 | -0.0018 | HMGCLL1   |
| rs13200335 | a | 6 | 0.0024  | TFEB      |
| rs11755724 | a | 6 | 0.0027  | RREB1     |
| rs1857859  | a | 6 | 0.0019  | SIM1      |
| rs1268168  | a | 6 | 0.0024  | FOXO3     |
| rs9397738  | a | 6 | 0.0027  | SCAF8     |
| rs77915916 | a | 6 | 0.0046  | CRIP3     |
| rs7740107  | a | 6 | 0.0027  | L3MBTL3   |
| rs3765502  | t | 6 | 0.0024  | DCDC2     |

---

---

|             |   |   |         |              |
|-------------|---|---|---------|--------------|
| rs144100226 | t | 6 | 0.0059  | HMGA1        |
| rs720989    | t | 6 | 0.0021  | SUPT3H       |
| rs35154268  | a | 7 | -0.0022 | SND1         |
| rs6968554   | a | 7 | -0.0019 | AHR          |
| rs62491533  | t | 7 | -0.0027 | UBE2H        |
| rs10254101  | t | 7 | -0.0068 | PRKAG2       |
| rs62435145  | t | 7 | -0.0060 | UNCX         |
| rs3750081   | t | 7 | -0.0022 | KBTBD2       |
| rs801193    | t | 7 | -0.0020 | GS1-124K5.11 |
| rs6973656   | a | 7 | 0.0035  | TMEM60       |
| rs700753    | c | 7 | 0.0031  | LOC730338    |
| rs55773927  | t | 7 | 0.0019  | VKORC1L1     |
| rs41301394  | t | 7 | 0.0023  | POR          |
| rs3757387   | t | 7 | 0.0030  | IRF5         |
| rs12671694  | t | 7 | 0.0025  | SHH          |
| rs868822    | t | 7 | 0.0029  | LINC01006    |
| rs11783418  | a | 8 | -0.0020 | XKR6         |
| rs10102889  | c | 8 | -0.0036 | NRG1         |
| rs2976178   | c | 8 | -0.0025 | WWP1         |
| rs2980423   | t | 8 | -0.0023 | PRAG1        |
| rs35353426  | t | 8 | -0.0026 | LOC157273    |
| rs10098664  | t | 8 | -0.0021 | BLK          |
| rs34861762  | t | 8 | -0.0043 | STC1         |
| rs1533059   | a | 8 | 0.0025  | MFHAS1       |
| rs7832708   | t | 8 | 0.0022  | MSRA         |
| rs2954017   | t | 8 | 0.0024  | TRIB1        |
| rs12377027  | a | 9 | -0.0026 | MLLT3        |
| rs13287724  | a | 9 | -0.0030 | B4GALT1-AS1  |
| rs1321917   | c | 9 | -0.0023 | ASTN2        |

---

---

|            |   |    |         |            |
|------------|---|----|---------|------------|
| rs544169   | a | 9  | 0.0022  | UBAP2      |
| rs2039424  | a | 9  | 0.0044  | PIP5K1B    |
| rs7024579  | t | 9  | 0.0023  | QSOX2      |
| rs2068888  | a | 10 | -0.0024 | CYP26A1    |
| rs4918943  | a | 10 | -0.0022 | SORBS1     |
| rs12240572 | a | 10 | -0.0032 | DNAJC9-AS1 |
| rs7095954  | a | 10 | -0.0018 | TSPAN14    |
| rs816850   | c | 10 | -0.0020 | KCNMA1     |
| rs1536225  | t | 10 | -0.0021 | PDCD11     |
| rs7072591  | a | 10 | 0.0019  | PARD3-AS1  |
| rs10821905 | a | 10 | 0.0037  | A1CF       |
| rs1055256  | a | 10 | 0.0025  | EEF1AKMT2  |
| rs80282103 | a | 10 | 0.0078  | LARP4B     |
| rs6481598  | c | 10 | 0.0024  | SVIL       |
| rs8474     | c | 10 | 0.0020  | PARG       |
| rs7475348  | t | 10 | 0.0031  | MYPN       |
| rs9420446  | t | 10 | 0.0023  | FAM35A     |
| rs10821944 | t | 10 | 0.0020  | ARID5B     |
| rs284859   | t | 10 | 0.0026  | WBP1L      |
| rs1541937  | a | 11 | -0.0029 | OR52H1     |
| rs1783827  | a | 11 | -0.0020 | MIR130A    |
| rs3892895  | a | 11 | -0.0023 | TPCN2      |
| rs963837   | t | 11 | -0.0057 | DCDC1      |
| rs6484504  | t | 11 | -0.0026 | DNAJC24    |
| rs2727040  | t | 11 | -0.0026 | TRIM49B    |
| rs948493   | t | 11 | -0.0033 | MIR1234    |
| rs11237450 | a | 11 | 0.0032  | GAB2       |
| rs63934    | a | 11 | 0.0041  | KCNQ1      |
| rs6589750  | a | 11 | 0.0020  | USP2-AS1   |

---

---

|             |   |    |         |           |
|-------------|---|----|---------|-----------|
| rs11564722  | t | 11 | 0.0033  | INS-IGF2  |
| rs61897431  | t | 11 | 0.0029  | SLC39A13  |
| rs7127946   | t | 11 | 0.0023  | OR4B1     |
| rs1813937   | t | 11 | 0.0022  | LOC646813 |
| rs10790452  | t | 11 | 0.0020  | SORL1     |
| rs10846157  | a | 12 | -0.0034 | RERG      |
| rs11062167  | a | 12 | -0.0039 | SLC6A13   |
| rs632887    | a | 12 | 0.0032  | TSPAN9    |
| rs117113238 | a | 12 | 0.0039  | BCL2L14   |
| rs2634675   | a | 12 | 0.0025  | ZNF641    |
| rs1275609   | a | 12 | 0.0024  | PHLDA1    |
| rs4238020   | t | 12 | 0.0029  | C12orf4   |
| rs12313306  | t | 12 | 0.0029  | R3HDM2    |
| rs41284816  | t | 13 | -0.0078 | DLEU2     |
| rs500830    | t | 13 | 0.0029  | DACH1     |
| rs61993680  | a | 14 | -0.0019 | SLC25A29  |
| rs72683923  | t | 14 | -0.0074 | L2HGDH    |
| rs6574652   | t | 14 | -0.0017 | STON2     |
| rs17184313  | t | 14 | -0.0029 | RIN3      |
| rs1028455   | a | 14 | 0.0020  | SPATA7    |
| rs690428    | a | 15 | -0.0039 | WDR72     |
| rs1994887   | a | 15 | -0.0020 | CGNL1     |
| rs351237    | a | 15 | -0.0018 | STRA6     |
| rs4886696   | a | 15 | -0.0032 | SIN3A     |
| rs6492982   | t | 15 | -0.0033 | INO80     |
| rs11071738  | t | 15 | -0.0025 | APH1B     |
| rs11071939  | t | 15 | -0.0039 | SMAD3     |
| rs1145077   | t | 15 | -0.0085 | GATM      |
| rs59646751  | t | 15 | -0.0023 | IGF1R     |

---



---

|            |   |    |         |           |
|------------|---|----|---------|-----------|
| rs4886755  | a | 15 | 0.0041  | NRG4      |
| rs17507300 | a | 15 | 0.0024  | BTBD1     |
| rs7169629  | c | 15 | 0.0018  | WDR73     |
| rs12913015 | t | 15 | 0.0027  | C15orf54  |
| rs956006   | t | 15 | 0.0019  | MGC15885  |
| rs2472297  | t | 15 | 0.0039  | CYP1A1    |
| rs166906   | t | 15 | 0.0033  | SCAPER    |
| rs9932625  | a | 16 | -0.0030 | LINC01571 |
| rs28581385 | a | 16 | -0.0028 | LINC01229 |
| rs154656   | a | 16 | -0.0030 | CHMP1A    |
| rs1635404  | t | 16 | -0.0025 | TRAP1     |
| rs193538   | t | 16 | -0.0020 | ABCC1     |
| rs7185391  | t | 16 | -0.0027 | SLC7A6    |
| rs62053077 | t | 16 | -0.0021 | MARVELD3  |
| rs7203398  | a | 16 | 0.0025  | CHD9      |
| rs77924615 | a | 16 | 0.0098  | PDILT     |
| rs62050038 | a | 16 | 0.0028  | WWP2      |
| rs438339   | t | 16 | 0.0035  | RPL3L     |
| rs1858800  | t | 16 | 0.0020  | ZFHX3     |
| rs883541   | a | 17 | -0.0022 | PRKAR1A   |
| rs2411192  | a | 17 | -0.0024 | MYO19     |
| rs8866     | c | 17 | -0.0018 | PITPNC1   |
| rs2349648  | t | 17 | -0.0017 | MPRIIP    |
| rs4794813  | a | 17 | 0.0055  | CDK12     |
| rs35662455 | c | 17 | 0.0030  | TEX14     |
| rs9903801  | c | 17 | 0.0047  | BCAS3     |
| rs9891340  | t | 17 | 0.0024  | SMCR2     |
| rs2440165  | t | 17 | 0.0040  | SLC47A1   |
| rs9895661  | t | 17 | 0.0069  | BCAS3     |

---

---

|             |   |    |         |              |
|-------------|---|----|---------|--------------|
| rs28735420  | t | 17 | 0.0039  | MAP2K4       |
| rs227731    | t | 17 | 0.0018  | C17orf67     |
| rs16942751  | a | 18 | -0.0029 | AQP4         |
| rs1719934   | a | 18 | 0.0026  | EPB41L3      |
| rs8096658   | c | 18 | 0.0050  | NFATC1       |
| rs4940525   | t | 18 | 0.0025  | LINC01544    |
| rs34647824  | a | 19 | -0.0021 | RRAS         |
| rs78241494  | t | 19 | -0.0030 | ZNF585A      |
| rs281380    | t | 19 | -0.0021 | MAMSTR       |
| rs2974751   | a | 19 | 0.0018  | CALR         |
| rs8101667   | t | 19 | 0.0044  | CEP89        |
| rs7251730   | t | 19 | 0.0024  | ZNF260       |
| rs113445505 | t | 19 | 0.0037  | ZNF781       |
| rs6087579   | a | 20 | -0.0028 | ITCH         |
| rs4408777   | a | 20 | -0.0021 | RGS19        |
| rs2235826   | a | 20 | -0.0030 | PCK1         |
| rs1041606   | t | 20 | -0.0021 | MACROD2      |
| rs17216707  | t | 20 | -0.0051 | CYP24A1      |
| rs1509117   | a | 20 | 0.0024  | PLCB1        |
| rs72629024  | c | 20 | 0.0035  | PPDPF        |
| rs62187537  | t | 20 | 0.0039  | FKBP1ASDCBP2 |
| rs1407040   | t | 20 | 0.0018  | GNAS         |
| rs35636653  | t | 20 | 0.0022  | OSBPL2       |
| rs2273684   | t | 20 | 0.0032  | GSS          |
| rs2823139   | a | 21 | -0.0026 | NRIP1        |
| rs2834317   | a | 21 | -0.0035 | LOC101928126 |
| rs2244237   | t | 21 | 0.0027  | CLDN14       |
| rs80576     | a | 22 | -0.0028 | APOL3        |
| rs4820324   | c | 22 | -0.0023 | MAFF         |

---

---

|             |   |    |        |        |
|-------------|---|----|--------|--------|
| rs131263    | t | 22 | 0.0024 | ZMAT5  |
| rs112880707 | t | 22 | 0.0052 | MKL1   |
| rs738527    | t | 22 | 0.0032 | A4GALT |

---

*Abbreviations:* Chr, chromosome; eGFR, estimated glomerular filtration rate; PGS, polygenic score; SNP, single nucleotide polymorphism.

**Supplementary Table S3. Associations (HRs and 95% CIs) between genetic risk of gut microbial abundance and incident CKD in 138,064 participants\*.**

| PGS of gut microbe                                                    | Cases/participants | Model 1           | Model 2           | Model 3           |
|-----------------------------------------------------------------------|--------------------|-------------------|-------------------|-------------------|
|                                                                       |                    | HR (95% CI)       | HR (95% CI)       | HR (95% CI)       |
| <b>Per standard deviation increase</b>                                | -                  | 1.03 (0.99, 1.07) | 1.03 (0.99, 1.07) | 1.03 (0.99, 1.07) |
| <b>Low genetically predicted gut microbial abundance<sup>a</sup></b>  | 1409/69032         | 1.00 (Ref)        | 1.00 (Ref)        | 1.00 (Ref)        |
| <b>High genetically predicted gut microbial abundance<sup>b</sup></b> | 1514/69032         | 1.02 (0.94, 1.09) | 1.02 (0.94, 1.09) | 1.02 (0.95, 1.09) |

\*HR and 95% CI were calculated using the cause-specific competing risk model.

Model 1: age at recruitment (years), sex (men, women), ethnicity (White, Asian, Black, Mixed), first 10 genetic principal components, genotyping batch.

Model 2: Model 1 + education (college or university degree, high school, below), average total household income before tax (<£18,000, £18,000–£51,999, >£52,000), Townsend Deprivation Index (continuous), physical activity (MET-min/week), intakes of carbohydrate, protein, and fat (percentage of energy intake), healthy dietary components (intake of fiber, vegetable, fruit, whole grain, and poultry; g/day), geographic location (England area or non-England area), and antibiotic usage as child or teenager (yes, no).

Model 3: Model 2 + history of hypertension, cardiovascular disease, diabetes (yes, no).

<sup>a</sup> Low genetically predicted gut microbial abundance (below the median of gut microbe PGS).

<sup>b</sup> High genetically predicted gut microbial abundance (above the median of gut microbe PGS).

*Abbreviations:* CIs, confidence intervals; CKD, chronic kidney disease; HRs, hazard ratios; PGS, polygenic score.

**Supplementary Table S4. Associations (HRs and 95% CIs) between genetic risk of eGFR and incident CKD in 138,064 participants\*.**

| PGS of eGFR                                        | Cases/participants | Model 1           | Model 2           | Model 3           |
|----------------------------------------------------|--------------------|-------------------|-------------------|-------------------|
|                                                    |                    | HR (95% CI)       | HR (95% CI)       | HR (95% CI)       |
| <b>Per standard deviation increase</b>             | -                  | 0.82 (0.79, 0.85) | 0.82 (0.79, 0.85) | 0.81 (0.78, 0.84) |
| <b>Low genetically predicted eGFR<sup>a</sup></b>  | 1703/69032         | 1.00 (Ref)        | 1.00 (Ref)        | 1.00 (Ref)        |
| <b>High genetically predicted eGFR<sup>b</sup></b> | 1220/69032         | 0.71 (0.66, 0.76) | 0.71 (0.66, 0.76) | 0.70 (0.65, 0.76) |

\*HR and 95% CI were calculated using the cause-specific competing risk model.

Model 1: age at recruitment (years), sex (men, women), ethnicity (White, Asian, Black, Mixed), first 10 genetic principal components, and genotyping batch.

Model 2: Model 1 + education (college or university degree, high school, below), average total household income before tax (<£18,000, £18,000–£51,999, >£52,000), Townsend Deprivation Index (continuous), physical activity (MET-min/week), intakes of carbohydrate, protein, and fat (percentage of energy intake).

Model 3: Model 2 + history of hypertension, cardiovascular disease, diabetes (yes, no).

<sup>a</sup> Low genetically predicted eGFR (below the median of eGFR PGS).

<sup>b</sup> High genetically predicted eGFR (above the median of eGFR PGS).

*Abbreviations:* CIs, confidence intervals; CKD, chronic kidney disease; eGFR, estimated glomerular filtration rate; HRs, hazard ratios; PGS, polygenic score.

**Supplementary Table S5. The associations (HRs and 95% CIs) between free sugar intake, non-free sugar intake, and incident CKD in sensitivity analyses restricting to participants who conducted two or more dietary assessments (n = 85,410).**

| Sugar intakes                                  | Model 1           | Model 2           | Model 3           |
|------------------------------------------------|-------------------|-------------------|-------------------|
|                                                | HR (95% CI)       | HR (95% CI)       | HR (95% CI)       |
| <b>Free sugar intake (% energy intake)</b>     |                   |                   |                   |
| <b>Quartile</b>                                |                   |                   |                   |
| < 8.21%                                        | 1.00 (Ref)        | 1.00 (Ref)        | 1.00 (Ref)        |
| ≥8.21% and <11.11%                             | 0.99 (0.87, 1.14) | 1.01 (0.88, 1.16) | 1.09 (0.95, 1.25) |
| ≥11.11% and <14.47%                            | 0.92 (0.80, 1.06) | 0.94 (0.82, 1.09) | 1.03 (0.90, 1.19) |
| ≥14.47%                                        | 1.23 (1.08, 1.40) | 1.22 (1.05, 1.41) | 1.34 (1.16, 1.55) |
| <i>P</i> -trend <sup>a</sup>                   | <0.01             | <0.01             | <0.001            |
| <b>Continuous (per 5% energy increase)</b>     | 1.10 (1.05, 1.15) | 1.08 (1.03, 1.14) | 1.12 (1.06, 1.17) |
| <b>Non-free sugar intake (% energy intake)</b> |                   |                   |                   |
| <b>Quartile</b>                                |                   |                   |                   |
| <8.94%                                         | 1.00 (Ref)        | 1.00 (Ref)        | 1.00 (Ref)        |
| ≥8.94% and <12.12%                             | 0.96 (0.84, 1.10) | 0.93 (0.81, 1.06) | 0.93 (0.81, 1.07) |
| ≥12.12% and <15.98%                            | 0.90 (0.79, 1.04) | 0.84 (0.73, 0.97) | 0.85 (0.73, 0.98) |
| ≥15.98%                                        | 0.89 (0.77, 1.03) | 0.77 (0.65, 0.90) | 0.77 (0.66, 0.91) |
| <i>P</i> -trend <sup>a</sup>                   | 0.08              | <0.001            | <0.001            |
| <b>Continuous (per 5% energy increase)</b>     | 0.96 (0.92, 1.00) | 0.88 (0.83, 0.93) | 0.88 (0.84, 0.93) |

\*HRs and 95% CIs were calculated with the use of the cause-specific competing risk model.

Model 1: age at recruitment (years), sex (men, women), and ethnicity (White, Asian, Black, Mixed).

Model 2: Model 1 + education (college or university degree, high school, below), average total household income before tax (<£18,000, £18,000–£51,999, >£52,000), Townsend Deprivation Index (continuous), physical activity (MET-min/week), intakes of carbohydrate, protein, and fat (percentage of energy intake).

Model 3: Model 2 + history of hypertension, cardiovascular disease, diabetes (yes, no).

<sup>a</sup> Test for trend based on variables containing the median value for each quartile.

*Abbreviations:* CIs, confidence intervals; CKD, chronic kidney disease; HRs, hazard ratios.

**Supplementary Table S6. The associations (HRs and 95% CIs) between free sugar intake, non-free sugar intake, and incident CKD in sensitivity analyses restricting to participants with  $\geq$  two years of follow-up (n = 137,342).**

| Sugar intakes                                  | Model 1           | Model 2           | Model 3           |
|------------------------------------------------|-------------------|-------------------|-------------------|
|                                                | HR (95% CI)       | HR (95% CI)       | HR (95% CI)       |
| <b>Free sugar intake (% energy intake)</b>     |                   |                   |                   |
| <b>Quartile</b>                                |                   |                   |                   |
| <7.89%                                         | 1.00 (Ref)        | 1.00 (Ref)        | 1.00 (Ref)        |
| $\geq$ 7.89% and <11.08%                       | 0.94 (0.84, 1.04) | 0.97 (0.87, 1.08) | 1.03 (0.92, 1.15) |
| $\geq$ 11.08% and <14.76%                      | 0.92 (0.83, 1.03) | 0.95 (0.85, 1.07) | 1.04 (0.93, 1.16) |
| $\geq$ 14.76%                                  | 1.17 (1.05, 1.29) | 1.18 (1.05, 1.32) | 1.29 (1.15, 1.44) |
| <i>P</i> -trend <sup>a</sup>                   | <0.01             | <0.01             | <0.0001           |
| <b>Continuous (per 5% energy increase)</b>     | 1.08 (1.05, 1.12) | 1.09 (1.05, 1.13) | 1.12 (1.08, 1.16) |
| <b>Non-free sugar intake (% energy intake)</b> |                   |                   |                   |
| <b>Quartile</b>                                |                   |                   |                   |
| <8.58%                                         | 1.00 (Ref)        | 1.00 (Ref)        | 1.00 (Ref)        |
| $\geq$ 8.58% and <12.06%                       | 0.88 (0.79, 0.98) | 0.83 (0.75, 0.93) | 0.85 (0.76, 0.95) |
| $\geq$ 12.06% and <16.26%                      | 0.84 (0.75, 0.93) | 0.76 (0.67, 0.85) | 0.77 (0.69, 0.87) |
| $\geq$ 16.26%                                  | 0.82 (0.73, 0.91) | 0.69 (0.61, 0.78) | 0.70 (0.62, 0.80) |
| <i>P</i> -trend <sup>a</sup>                   | <0.001            | <0.0001           | <0.0001           |
| <b>Continuous (per 5% energy increase)</b>     | 0.94 (0.91, 0.97) | 0.89 (0.85, 0.92) | 0.89 (0.86, 0.93) |

\*HRs and 95% CIs were calculated with the use of the cause-specific competing risk model.

Model 1: age at recruitment (years), sex (men, women), and ethnicity (White, Asian, Black, Mixed).

Model 2: Model 1 + education (college or university degree, high school, below), average total household income before tax (<£18,000, £18,000–£51,999, >£52,000), Townsend Deprivation Index (continuous), physical activity (MET-min/week), intakes of carbohydrate, protein, and fat (percentage of energy intake).

Model 3: Model 2 + history of hypertension, cardiovascular disease, diabetes (yes, no).



<sup>a</sup> Test for trend based on variables containing the median value for each quartile.

*Abbreviations:* CIs, confidence intervals; CKD, chronic kidney disease; HRs, hazard ratios.

**Supplementary Table S7. The associations (HRs and 95% CIs) between free sugar intake and non-free sugar intake in grams and incident CKD in 138,064 participants.**

| Sugar intakes                        | Model 1           | Model 2           | Model 3           |
|--------------------------------------|-------------------|-------------------|-------------------|
|                                      | HR (95% CI)       | HR (95% CI)       | HR (95% CI)       |
| <b>Free sugar intake (g/day)</b>     |                   |                   |                   |
| <b>Quartile</b>                      |                   |                   |                   |
| <36.36 g/day                         | 1.00 (Ref)        | 1.00 (Ref)        | 1.00 (Ref)        |
| ≥36.36 g/day and <55.01 g/day        | 0.95 (0.86, 1.05) | 0.98 (0.88, 1.09) | 1.03 (0.92, 1.14) |
| ≥55.01 g/day and <78.54 g/day        | 0.89 (0.80, 0.99) | 0.92 (0.82, 1.03) | 1.00 (0.90, 1.12) |
| ≥78.54 g/day                         | 1.13 (1.02, 1.25) | 1.14 (1.02, 1.27) | 1.26 (1.12, 1.41) |
| <i>P</i> -trend <sup>a</sup>         | 0.01              | 0.01              | <0.0001           |
| <b>Continuous (per 5g increase)</b>  | 1.01 (1.01, 1.02) | 1.01 (1.01, 1.02) | 1.02 (1.01, 1.02) |
| <b>Non-free sugar intake (g/day)</b> |                   |                   |                   |
| <b>Quartile</b>                      |                   |                   |                   |
| <42.53 g/day                         | 1.00 (Ref)        | 1.00 (Ref)        | 1.00 (Ref)        |
| ≥42.53 g/day and <59.89 g/day        | 0.87 (0.79, 0.96) | 0.86 (0.78, 0.95) | 0.88 (0.79, 0.97) |
| ≥59.89 g/day and <80.17 g/day        | 0.76 (0.69, 0.85) | 0.75 (0.67, 0.83) | 0.77 (0.69, 0.85) |
| ≥80.17 g/day                         | 0.74 (0.67, 0.82) | 0.70 (0.62, 0.78) | 0.72 (0.64, 0.80) |
| <i>P</i> -trend <sup>a</sup>         | 0.001             | <0.0001           | <0.0001           |
| <b>Continuous (per 5g increase)</b>  | 0.99 (0.98, 0.99) | 0.98 (0.97, 0.99) | 0.98 (0.98, 0.99) |

\*HRs and 95% CIs were calculated with the use of the cause-specific competing risk model.

Model 1: age at recruitment (years), sex (men, women), and ethnicity (White, Asian, Black, Mixed).

Model 2: Model 1 + education (college or university degree, high school, below), average total household income before tax (<£18,000, £18,000–£51,999, >£52,000), Townsend Deprivation Index (continuous), physical activity (MET-min/week), intakes of carbohydrate, protein, and fat (percentage of energy intake).

Model 3: Model 2 + history of hypertension, cardiovascular disease, diabetes (yes, no).

<sup>a</sup> Test for trend based on variables containing the median value for each quartile.

*Abbreviations:* CIs, confidence intervals; CKD, chronic kidney disease; HRs, hazard ratios.

**Supplementary Table S8. Associations (HRs and 95% CIs) between free and non-free sugar intakes to carbohydrates intakes ratio, and incident CKD in 138,064 participants.**

| Sugar intakes                                 | Model 1           | Model 2           | Model 3           |
|-----------------------------------------------|-------------------|-------------------|-------------------|
|                                               | HR (95% CI)       | HR (95% CI)       | HR (95% CI)       |
| <b>Free sugars to carbohydrates ratio</b>     |                   |                   |                   |
| <b>Quartile</b>                               |                   |                   |                   |
| <16.26%                                       | 1.00 (Ref)        | 1.00 (Ref)        | 1.00 (Ref)        |
| ≥16.26% and <22.50%                           | 0.98 (0.89, 1.09) | 1.02 (0.91, 1.13) | 1.08 (0.97, 1.20) |
| ≥22.50% and <29.47%                           | 1.03 (0.93, 1.15) | 1.08 (0.97, 1.20) | 1.17 (1.05, 1.30) |
| ≥29.47%                                       | 1.15 (1.04, 1.28) | 1.19 (1.07, 1.33) | 1.30 (1.17, 1.45) |
| <i>P</i> -trend <sup>a</sup>                  | <0.01             | <0.001            | <0.0001           |
| <b>Continuous (per 5% increase)</b>           | 1.03 (1.01, 1.05) | 1.04 (1.02, 1.06) | 1.05 (1.03, 1.07) |
| <b>Non-free sugars to carbohydrates ratio</b> |                   |                   |                   |
| <b>Quartile</b>                               |                   |                   |                   |
| <18.08%                                       | 1.00 (Ref)        | 1.00 (Ref)        | 1.00 (Ref)        |
| ≥18.08% and <24.35%                           | 0.87 (0.79, 0.97) | 0.88 (0.80, 0.98) | 0.89 (0.80, 0.99) |
| ≥24.35% and <31.65%                           | 0.80 (0.72, 0.88) | 0.80 (0.72, 0.89) | 0.81 (0.73, 0.90) |
| ≥31.65%                                       | 0.75 (0.67, 0.84) | 0.74 (0.66, 0.83) | 0.75 (0.67, 0.84) |
| <i>P</i> -trend <sup>a</sup>                  | <0.001            | <0.0001           | <0.0001           |
| <b>Continuous (per 5% increase)</b>           | 0.94 (0.93, 0.96) | 0.94 (0.92, 0.96) | 0.94 (0.92, 0.96) |

\*HRs and 95% CIs were calculated with the use of the cause-specific competing risk model.

Model 1: age at recruitment (years), sex (men, women), and ethnicity (White, Asian, Black, Mixed).

Model 2: Model 1 + education (college or university degree, high school, below), average total household income before tax (<£18,000, £18,000–£51,999, >£52,000), Townsend Deprivation Index (continuous), physical activity (MET-min/week), intakes of carbohydrate, protein, and fat (percentage of energy intake).

Model 3: Model 2 + history of hypertension, cardiovascular disease, diabetes (yes, no).

<sup>a</sup> Test for trend based on variables containing the median value for each quartile. *Abbreviations:* CIs, confidence intervals; CKD, chronic kidney disease; HRs, hazard ratios.

**Supplementary Table S9. Associations (HRs and 95% CIs) between free sugar intake, non-free sugar intake, and incident CKD using the sub-distribution competing risk model in 138,064 participants.**

| Sugar intakes                                  | Model 1           | Model 2           | Model 3           |
|------------------------------------------------|-------------------|-------------------|-------------------|
|                                                | HR (95% CI)       | HR (95% CI)       | HR (95% CI)       |
| <b>Free sugar intake (% energy intake)</b>     |                   |                   |                   |
| <b>Quartile</b>                                |                   |                   |                   |
| <7.89%                                         | 1.00 (Ref)        | 1.00 (Ref)        | 1.00 (Ref)        |
| ≥7.89% and <11.08%                             | 0.94 (0.85, 1.04) | 0.97 (0.88, 1.08) | 1.04 (0.93, 1.16) |
| ≥11.08% and <14.77%                            | 0.93 (0.84, 1.03) | 0.97 (0.87, 1.08) | 1.06 (0.95, 1.18) |
| ≥14.77%                                        | 1.18 (1.06, 1.30) | 1.20 (1.08, 1.34) | 1.31 (1.17, 1.46) |
| <b>P-trend<sup>a</sup></b>                     | <0.001            | <0.001            | <0.0001           |
| <b>Continuous (per 5% energy increase)</b>     | 1.07 (1.03, 1.10) | 1.10 (1.06, 1.14) | 1.12 (1.08, 1.16) |
| <b>Non-free sugar intake (% energy intake)</b> |                   |                   |                   |
| <b>Quartile</b>                                |                   |                   |                   |
| <8.58%                                         | 1.00 (Ref)        | 1.00 (Ref)        | 1.00 (Ref)        |
| ≥8.58% and <12.05%                             | 0.86 (0.78, 0.96) | 0.82 (0.74, 0.91) | 0.83 (0.75, 0.93) |
| ≥12.05% and <16.25%                            | 0.84 (0.75, 0.93) | 0.75 (0.68, 0.84) | 0.77 (0.69, 0.86) |
| ≥16.25%                                        | 0.80 (0.72, 0.89) | 0.67 (0.59, 0.76) | 0.68 (0.60, 0.77) |
| <b>P-trend<sup>a</sup></b>                     | <0.0001           | <0.0001           | <0.0001           |
| <b>Continuous (per 5% energy increase)</b>     | 1.00 (0.97, 1.03) | 0.88 (0.85, 0.92) | 0.89 (0.85, 0.92) |

\*HR and 95% CI were calculated with the use of the sub-distribution competing risk model (Fine and Gray's model).

Model 1: age at recruitment (years), sex (men, women), and ethnicity (White, Asian, Black, Mixed).

Model 2: Model 1 + education (college or university degree, high school, below), average total household income before tax (<£18,000, £18,000–£51,999, >£52,000), Townsend Deprivation Index (continuous), physical activity (MET-min/week), intakes of carbohydrate, protein, and fat (percentage of energy intake).

Model 3: Model 2 + history of hypertension, cardiovascular disease, diabetes (yes, no).

<sup>a</sup> Test for trend based on variables containing the median value for each quartile.

*Abbreviations:* CIs, confidence intervals; CKD, chronic kidney disease; HRs, hazard ratios.

**Supplementary Table S10. Associations (HRs and 95% CIs) between free sugar intake, non-free sugar intake, and incident CKD with further adjustments of cardiometabolic biomarkers or eGFR.**

| <b>Model 1 (N = 131,340)</b>                   |                    | <b>Model 2 (N = 131,396)</b>                   |                    |
|------------------------------------------------|--------------------|------------------------------------------------|--------------------|
| <b>Sugar intakes</b>                           | <b>HR (95% CI)</b> | <b>Sugar intakes</b>                           | <b>HR (95% CI)</b> |
| <b>Free sugar intake (% energy intake)</b>     |                    | <b>Free sugar intake (% energy intake)</b>     |                    |
| <b>Quartile</b>                                |                    | <b>Quartile</b>                                |                    |
| <7.89%                                         | 1.00 (Ref)         | <7.89%                                         | 1.00 (Ref)         |
| ≥7.89% and <11.08%                             | 1.02 (0.92, 1.14)  | ≥7.89% and <11.08%                             | 0.99 (0.88, 1.10)  |
| ≥11.08% and <14.77%                            | 1.04 (0.93, 1.16)  | ≥11.08% and <14.77%                            | 0.99 (0.89, 1.11)  |
| ≥14.77%                                        | 1.28 (1.14, 1.44)  | ≥14.77%                                        | 1.18 (1.05, 1.32)  |
| P-trend <sup>a</sup>                           | <0.0001            | P-trend <sup>a</sup>                           | <0.01              |
| <b>Continuous (per 5% energy increase)</b>     | 1.11 (1.07, 1.15)  | <b>Continuous (per 5% energy increase)</b>     | 1.08 (1.04, 1.12)  |
| <b>Non-free sugar intake (% energy intake)</b> |                    | <b>Non-free sugar intake (% energy intake)</b> |                    |
| <b>Quartile</b>                                |                    | <b>Quartile</b>                                |                    |
| <8.58%                                         | 1.00 (Ref)         | <8.58%                                         | 1.00 (Ref)         |
| ≥8.58% and <12.05%                             | 0.83 (0.74, 0.93)  | ≥8.58% and <12.05%                             | 0.87 (0.78, 0.97)  |
| ≥12.05% and <16.25%                            | 0.78 (0.70, 0.88)  | ≥12.05% and <16.25%                            | 0.85 (0.75, 0.95)  |
| ≥16.25%                                        | 0.69 (0.61, 0.79)  | ≥16.25%                                        | 0.78 (0.69, 0.89)  |
| P-trend <sup>a</sup>                           | <0.0001            | P-trend <sup>a</sup>                           | <0.001             |
| <b>Continuous (per 5% energy increase)</b>     | 0.89 (0.86, 0.93)  | <b>Continuous (per 5% energy increase)</b>     | 0.92 (0.89, 0.96)  |

\*HRs and 95% CIs were calculated with the use of the cause-specific competing risk model.

Participants with missing value on cardiometabolic biomarkers (triglycerides, LDL-c, hs-CRP) or eGFR was excluded.

Model 1: age at recruitment (years), sex (men, women), and ethnicity (White, Asian, Black, Mixed), education (college or university degree, high school, below), average total household income before tax (<£18,000, £18,000–£51,999, >£52,000), Townsend Deprivation Index (continuous), physical activity (MET-min/week), intakes of carbohydrate, protein, and fat (percentage of energy intake), history of hypertension, cardiovascular



disease, diabetes (yes, no), and cardiometabolic biomarkers (triglycerides, LDL-c, hs-CRP).

Model 2: age at recruitment (years), sex (men, women), and ethnicity (White, Asian, Black, Mixed), education (college or university degree, high school, below), average total household income before tax (<£18,000, £18,000–£51,999, >£52,000), Townsend Deprivation Index (continuous), physical activity (MET-min/week), intakes of carbohydrate, protein, and fat (percentage of energy intake), history of hypertension, cardiovascular disease, diabetes (yes, no), and eGFR).

<sup>a</sup> Test for trend based on variables containing the median value for each quartile. excluding non-free sugar.

*Abbreviations:* CIs, confidence intervals; CKD, chronic kidney disease; HRs, hazard ratios; eGFR, estimated glomerular filtration rate; LDL-C, low-density lipoprotein cholesterol; hs-CRP, high-sensitive C-reactive protein.
